# Supplementary material for: Novel Insights into the Nature of Intraspecific Genome Size Diversity in Cannabis sativa L
Source: Plants (Basel). 2022 Oct 16;11(20):2736. doi: 10.3390/plants11202736 (PMC9607409; doi:10.3390/plants11202736)
Supplement: Supplementary file 1 [file plants-11-02736-s001.zip]

Archive with 6 entries (6 files):
- FigureS1.pdf
- TableS1.xlsx
- TableS2.xlsx
- TableS3.xlsx
- TableS4.xlsx
- TableS5.xlsx
