# Supplementary material for: Novel Insights into the Nature of Intraspecific Genome Size Diversity in Cannabis sativa L
Source: Plants (Basel). 2022 Oct 16;11(20):2736. doi: 10.3390/plants11202736 (PMC9607409; doi:10.3390/plants11202736)
Supplement: Supplementary file 1 [file plants-11-02736-s001.zip › TableS1.xlsx]

## Sheet: Table S1
Accession ID	Accession	Type	Locality	Latitude (N)	Longitude (E)	No. of individuals measured	Genome size (pg/2C)				CV (%)		Ratio (fold)	%	Chromosome counts
							Min.	Max.	Mean	SD	Mean	SD
AM1	Armenia 1	Wild/feral	Armenia, Gegharkunik marz, Lichk village	40.175278	45.232778	9	1.98727	2.05085	2.02775	0.0216363	3.35278	0.350599	1.03199	3.1992	/
AM12	Armenia 12	Wild/feral	Armenia, Sjunik marz, crossroad between Sisian town and Ujts village	39.510556	46.044167	5	1.87287	2.01679	1.94742	0.052555	3.142	0.34559	1.07685	7.68453	/
AM14	Armenia 14	Wild/feral	Armenia, Sjunik marz, Tatev village, near monastery Tatev	39.380000	46.253611	5	1.96172	2.09403	2.01509	0.0540708	3.66	0.297216	1.06745	6.74471	/
AM15	Armenia 15	Wild/feral	Armenia, Sjunik marz, Goris town, in front of the military unit	39.523056	46.326667	8	1.9156	2.15206	1.99848	0.0863391	3.39562	0.439857	1.12344	12.3439	/
AM17	Armenia 17	Wild/feral	Armenia, Sjunik marz, Artsvanik village, near the road	39.267500	46.471111	5	1.93508	2.00717	1.96427	0.033558	2.797	0.184343	1.03725	3.72532	/
AM18	Armenia 18	Wild/feral	Armenia, Sjunik marz, vicinity of Shikahogh village	39.092222	46.496667	5	1.94098	2.04473	1.98108	0.0407548	3.27	0.340092	1.05346	5.34564	/
AM20	Armenia 20	Wild/feral	Armenia, Shirak marz, Garibjanyan village, near the road	40.752778	43.813333	5	1.92743	1.99183	1.95783	0.0258484	3.306	0.141439	1.03342	3.34152	/
AM3	Armenia 3	Wild/feral	Armenia, Gegharkunik marz, Tsovinar village	40.163056	45.491388	9	1.91258	2.03502	1.97747	0.043171	3.365	0.259663	1.06402	6.40174	/
AM4	Armenia 4	Wild/feral	Armenia, Lori marz, Vanadzor, near the road to Bazum village	40.833333	44.488889	5	1.93162	1.99254	1.96146	0.0282374	3.511	0.249885	1.03154	3.15399	/
AM5	Armenia 5	Wild/feral	Armenia, Lori marz, Bazum village	40.863333	44.440833	5	1.96396	2.03055	1.99887	0.0278596	3.324	0.262426	1.03391	3.39051	/
AM6	Armenia 6	Wild/feral	Armenia, Lori marz, Gerger village	40.956389	44.448889	9	1.89661	2.02122	1.94501	0.0460484	3.54167	0.192175	1.0657	6.57029	/
AM9	Armenia 9	Wild/feral	Armenia, Tavush marz, Hovk village, near the road	40.788333	45.057222	5	1.89411	1.98966	1.9533	0.0387039	3.437	0.395863	1.05044	5.04436	/
BG1	Bulgaria 1	Wild/feral	Bulgaria, Belovo, Malko Belovo, edge of an abandoned field	42.203919	24.070688	5	1.93223	1.99183	1.97199	0.023772	3.753	0.483226	1.03084	3.08423	/
BG10	Bulgaria 10	Wild/feral	Bulgaria, Tsonevo, edge of a field	43.031350	27.445058	5	1.86857	1.95714	1.90478	0.0334167	3.215	0.276767	1.0474	4.74008	/
BG2	Bulgaria 2	Wild/feral	Bulgaria, Lom, Rasovo, edge of a field	43.747050	23.257366	5	1.91875	2.00447	1.96343	0.037881	3.637	0.456927	1.04467	4.4675	/
BG3	Bulgaria 3	Wild/feral	Bulgaria, Mizia, edge of a field	43.685715	23.883524	5	1.94965	2.01088	1.97359	0.0232068	3.222	0.380864	1.03141	3.14065	/
BG4	Bulgaria 4	Wild/feral	Bulgaria, Belene, edge of a field	43.628481	25.121559	5	1.88738	1.97638	1.93235	0.0322863	3.684	0.192691	1.04716	4.71572	/
BG5	Bulgaria 5	Wild/feral	Bulgaria, Trastenik, edge of a field	43.620888	25.853954	5	1.89333	1.9703	1.9149	0.0316438	3.275	0.454588	1.04066	4.06569	/
CULF1	Fibre/Seed cultivar 1	Fibre/Seed cultivar	Unknown cultivar - Bulgaria, Brashlen	43.992471	26.375067	5	1.88366	1.95864	1.93651	0.0300887	3.459	0.403491	1.0398	3.98034	/
BG7	Bulgaria 7	Wild/feral	Bulgaria, Tarnovtsi, edge of a field	43.995172	26.714866	5	1.86841	1.99762	1.91884	0.0533093	3.305	0.370456	1.06916	6.9158	/
BG8	Bulgaria 8	Wild/feral	Bulgaria, Silistra, edge of a field	44.073157	27.292398	7	1.88418	1.98425	1.93966	0.0374243	3.49143	0.262102	1.05311	5.31102	/
BG9	Bulgaria 9	Wild/feral	Bulgaria, Dobrič, Karapelit, edge of a field	43.624009	27.614818	5	1.83707	2.02476	1.9636	0.0746598	3.256	0.339105	1.10217	10.2169	/
BNG	Bangladesh	Wild/feral	Bangladesh, Rangpur, Carmichael College Campus	25.719712	89.254616	9	1.86763	2.01168	1.93485	0.0437076	3.28444	0.273432	1.07713	7.71311	/
CULF2	Futura 75	Fibre/seed cultivar	Cultivar Futura 75	/		5	1.92209	1.9733	1.95226	0.0185976	3.142	0.143988	1.02665	2.66459	/
CULF3	Komploti	Fibre/seed cultivar	Cultivar Komploti	/		5	1.95894	2.00617	1.9767	0.0207662	3.156	0.3441	1.02411	2.41122	/
CULF4	Santhica 70	Fibre/seed cultivar	Cultivar Santhica 70	/		7	1.9168	2.03918	1.96278	0.0419199	3.28786	0.662551	1.06384	6.3845	/
CULF5	Tiborszallasi	Fibre/seed cultivar	Cultivar Tiborszallasi	/		7	1.88873	1.98796	1.94696	0.0358603	3.18714	0.33049	1.05254	5.25383	/
CAM	Cambodia	Landrace	Cambodia, Siem Reap	13.605778	103.397194	10	1.91322	2.08111	2.01729	0.0483778	3.6645	0.187683	1.08776	8.77571	20
ETH	Ethiopia	Landrace	Ethiopia, Shashamene	/		7	1.93758	2.0264	1.98203	0.0363794	3.24429	0.264172	1.04584	4.58391	20
GHA	Ghana	Landrace	Ghana	/		7	1.91365	2.05084	1.97536	0.0482112	3.70429	0.531801	1.07169	7.16923	20
GM	Gambia	Landrace	Gambia	/		6	1.85813	1.97386	1.9353	0.0424267	3.45667	0.381388	1.06228	6.22825	/
HU1	Hungary 1	Wild/feral	Hungary, Nyírvasvári, edge of a road	47.811079	22.210560	5	1.93911	1.98093	1.96352	0.0201316	3.602	0.367604	1.02157	2.15666	/
HU10	Hungary 10	Wild/feral	Hungary, Sombotel, Vép, edge of a field	47.214584	16.744651	5	1.91123	2.00567	1.96023	0.0409786	3.694	0.446254	1.04941	4.94102	/
HU11	Hungary 11	Wild/feral	Hungary, Veszprém, edge of a field	47.054612	17.927455	10	1.85106	1.93191	1.91064	0.0234395	3.3925	0.523101	1.04368	4.36777	/
HU12	Hungary 12	Wild/feral	Hungary, Paks, edge of the road	46.604370	18.825995	5	1.86152	2.01903	1.9386	0.0718833	3.831	0.490298	1.08461	8.46149	/
HU2	Hungary 2	Wild/feral	Hungary, Budapest, close to the Franz Liszt Airport, edge of a field	47.404755	19.299448	6	1.89814	2.02476	1.95143	0.0489325	3.5075	0.289253	1.06671	6.67079	/
HU3	Hungary 3	Wild/feral	Hungary, Kecskemét, field	46.927294	19.635857	5	1.85998	1.98481	1.93899	0.0467319	3.345	0.472229	1.06711	6.71141	/
HU4	Hungary 4	Wild/feral	Hungary, Szeged, edge of a field	46.299357	20.069730	5	1.95001	2.0094	1.98014	0.0280557	3.582	0.372451	1.03046	3.04574	/
HU5	Hungary 5	Wild/feral	Hungary, Békéscsaba, Murony, edge of a field	46.765649	21.014306	5	1.85691	1.95193	1.89989	0.0361164	3.498	0.351312	1.05117	5.11707	/
HU6	Hungary 6	Wild/feral	Hungary, Tiszafüred, edge of a field	47.569812	20.773382	5	1.90464	2.01794	1.96097	0.0435807	3.326	0.354884	1.05948	5.94841	/
HU7	Hungary 7	Wild/feral	Hungary, Miškolc, Onga, edge of a field	48.110960	20.935823	8	1.88997	2.02241	1.93486	0.0426149	3.75813	0.51211	1.07007	7.00727	/
HU8	Hungary 8	Wild/feral	Hungary, Tát, edge of a filed	47.736223	18.630363	6	1.90868	1.99998	1.95569	0.0358271	3.205	0.366483	1.04784	4.78371	/
HU9	Hungary 9	Wild/feral	Hungary, Gyor, Töltéstava, edge of a field	47.618364	17.717478	11	1.8745	2.07213	1.95492	0.058249	3.72182	0.415928	1.10543	10.5432	/
IND1	India 1	Wild/feral	India, Uttarakhand	/		3	1.8764	1.94879	1.90466	0.038718	3.64833	0.583574	1.03858	3.85785	20 and 30
IND2	India 2	Landrace	India, Kerala	/		10	1.95844	2.0753	2.02695	0.0382312	3.655	0.631757	1.05967	5.96676	/
IND3	India 3	Wild/feral	India, Himachal Pradesh	/		6	1.88301	1.98542	1.93214	0.0369304	3.27417	0.268448	1.05438	5.43832	/
IND4	India 4	Landrace	India, Uttarakhand	/		4	1.96537	2.00906	1.99092	0.0183422	3.2525	0.254608	1.02223	2.22276	/
CULF6	Carmagnola	Fibre/seed cultivar	Cultivar Carmagnola	/		6	1.83382	1.9624	1.92112	0.0496763	3.17333	0.290063	1.07012	7.01161	/
CULF7	Finola	Fibre/seed cultivar	Cultivar Finola	/		7	1.968	2.03987	1.99947	0.0259154	3.26357	0.328135	1.03652	3.65192	/
KAZ	Kazakhstan	Wild/feral	Kazakhstan, East Kazakhstan	/		12	1.85921	2.00573	1.92716	0.0465861	3.32333	0.637289	1.07881	7.88065	20
KG1	Kyrgyzstan 1	Wild/feral	Kyrgyzstan, North-east Kyrgyzstan	/		5	1.83824	1.95848	1.90044	0.0451832	3.768	0.534984	1.06541	6.54121	/
KG2	Kyrgyzstan 2	Wild/feral	Kyrgyzstan, North-east Kyrgyzstan	/		7	1.88676	1.97864	1.92766	0.0312193	3.68357	0.55027	1.0487	4.86975	/
CULF8	Silvana	Fibre/seed cultivar	Cultivar Silvana (Agricultural Research and Development Station Lovrin)	/		5	1.90666	1.97618	1.93553	0.0274934	3.211	0.450436	1.03646	3.64636	/
MAR	Morocco	Landrace	Morocco, North Morocco	/		10	1.90426	2.0502	1.97406	0.0451349	3.329	0.295727	1.07664	7.66367	/
CULD1	Drug cultivar 1	Drug cultivar	Drug cultivar; Mexico, Michoacan	/		2	1.89547	1.97987	1.93767	0.0596851	3.3125	0.0813173	1.04453	4.45312	/
MN1	Mongolia 1	Wild/feral	Mongolia, Khentii aimag, Dadal sum centre	48.896722	111.612861	6	1.96864	2.05776	2.02056	0.0334361	3.6325	0.421696	1.04527	4.52684	/
MN2	Mongolia 2	Wild/feral	Mongolia, Khentii aimag, Dadal sum	48.827194	111.637250	3	1.93803	1.99139	1.96827	0.0273873	3.38833	0.183734	1.02754	2.75365	/
MN3	Mongolia 3	Wild/feral	Mongolia, Dornod aimag, Bayan-Uul sum centre	49.269417	112.497639	8	1.90764	2.11813	1.97565	0.0688683	3.5	0.294218	1.11034	11.0337	/
MN4	Mongolia 4	Wild/feral	Mongolia, Sukhbaatar aimag, Khalzan sum	46.323833	113.024472	2	1.94833	2.01101	1.97967	0.0443191	3.6375	0.286378	1.03217	3.21693	/
MN5	Mongolia 5	Wild/feral	Mongolia, Sukhbaatar aimag, Khalzan sum	46.242644	112.955916	5	1.81012	2.01604	1.94318	0.0800372	3.418	0.125927	1.11376	11.3762	/
MN6	Mongolia 6	Wild/feral	Mongolia, Tuv aimag, Bornuur sum	48.514222	106.284389	3	1.84576	1.99443	1.92433	0.0747005	3.35333	0.120968	1.08055	8.05509	/
MN7	Mongolia 7	Wild/feral	Mongolia, Selenge aimag, Shaamar sum	50.111111	106.191278	2	1.95567	2.06122	2.00844	0.0746322	3.695	0.346482	1.05397	5.39691	/
MN8	Mongolia 8	Wild/feral	Mongolia, Selenge aimag, Nomgon sum	49.286306	105.768611	2	1.91461	1.9694	1.94201	0.0387431	3.3775	0.00353553	1.02862	2.86173	/
MN9	Mongolia 9	Wild/feral	Mongolia, Selenge aimag, Baruunburen sum	49.122222	104.849972	6	1.88648	2.01754	1.96289	0.0479307	3.4175	0.449074	1.06947	6.94748	/
NEP1	Nepal 1	Landrace	Nepal	/		5	1.97593	2.04003	2.00686	0.0231904	2.944	0.154329	1.03244	3.24374	/
NEP2	Nepal 2	Landrace	Nepal, Sudurpashchim Province, Kolti	/		5	1.97961	2.04684	2.01019	0.0283621	3.679	0.648155	1.03396	3.39617	20
NEP3	Nepal 3	Wild/feral	Nepal, Bagmati Province, Nagarkot	/		2	1.92783	1.98469	1.95626	0.0402076	3.1325	0.470226	1.0295	2.94954	/
RO1	Romania 1	Wild/feral	Romania, Mangalija, edge of a field	43.824769	28.499437	5	1.90852	1.96828	1.94287	0.024444	3.464	0.184065	1.03131	3.13082	/
RO10	Romania 10	Wild/feral	Romania, Valea lui Mihai, edge of a field	47.523624	22.179384	4	1.91798	2.02018	1.96781	0.0540961	3.595	0.0441588	1.05329	5.32864	/
RO2	Romania 2	Wild/feral	Romania, Constanta, Murfatlar, edge of a field	44.180428	28.402595	7	1.85913	1.9485	1.91771	0.0367682	3.23143	0.435619	1.04807	4.8071	/
RO3	Romania 3	Wild/feral	Romania, Tichileşti, edge of a field	44.600447	28.132737	6	1.89656	1.97431	1.93894	0.0251875	3.26083	0.229879	1.04099	4.09917	/
RO4	Romania 4	Wild/feral	Romania, Tulcea, Malcoci, next to the road, close to the field	45.145273	28.877890	5	1.93662	1.9746	1.95369	0.0137515	3.299	0.185553	1.01961	1.96108	/
RO5	Romania 5	Wild/feral	Romania, Galaţi, Traian, edge of a field field	45.421505	27.892731	6	1.85697	2.00979	1.92299	0.0678004	3.58833	0.302203	1.08229	8.22921	20
RO6	Romania 6	Wild/feral	Romania, Paşcani, Soci, edge of a field	47.194866	26.620099	5	1.91676	1.9821	1.94862	0.0295572	3.563	0.589487	1.03409	3.40877	/
RO7	Romania 7	Wild/feral	Romania, Bacău, Cleja, edge of a field	46.428464	26.927708	7	1.87288	1.94518	1.91281	0.0298145	3.31929	0.391955	1.0386	3.86037	/
RO8	Romania 8	Wild/feral	Romania, Buzău, Săhăteni, edge of a field	45.027177	26.504417	5	1.84095	1.97453	1.88955	0.0534801	2.925	0.304241	1.07256	7.25581	/
RO9	Romania 9	Wild/feral	Romania, Craiova, Işalniţa, next to the railways	44.378360	23.731496	5	1.96187	2.03761	1.99201	0.0318589	3.49	0.154434	1.0386	3.86047	/
SB11	Serbia11	Wild/feral	Serbia, Vrela	44.832978	21.109631	6	1.83862	1.98877	1.90692	0.0489283	3.2925	0.213043	1.08166	8.16603	20
SB6	Serbia6	Wild/feral	Serbia, Grevenac	44.908769	21.256986	5	1.90319	1.9757	1.94066	0.0311469	2.98	0.128841	1.0381	3.80965	20
SB8	Serbia8	Wild/feral	Serbia, Susara	44.921264	21.128728	3	1.87495	1.98049	1.93892	0.0562277	3.275	0.276632	1.05629	5.62911	/
SB9	Serbia9	Wild/feral	Serbia, Baracki Karlovac	45.040869	21.033919	5	1.89834	1.97993	1.94986	0.0309314	3.66	0.118954	1.04298	4.29781	/
CULF9	Fibre/Seed cultivar 9	Fibre/seed cultivar	Unknown cultivar; Slovenia, Unec, Highway exit	45.823690	14.285804	5	1.84817	1.96724	1.91316	0.0497587	2.879	0.265033	1.06442	6.44246	/
SLO2	Slovenia 2	Wild/Feral	Slovenia, Ljubljana, Vizmarje	46.108470	14.488350	5	1.94587	2.01672	1.98708	0.029198	3.465	0.363335	1.03641	3.6412	/
CULF10	Fibre/Seed cultivar 10	Fibre/seed cultivar	Unknown cultivar; Turkey, Samsun, Vezirköprü	41.1397	35.5017	6	1.94429	1.99293	1.96519	0.0210244	3.10083	0.238567	1.02502	2.50169	/
