# Supplementary material for: Novel Insights into the Nature of Intraspecific Genome Size Diversity in Cannabis sativa L
Source: Plants (Basel). 2022 Oct 16;11(20):2736. doi: 10.3390/plants11202736 (PMC9607409; doi:10.3390/plants11202736)
Supplement: Supplementary file 1 [file plants-11-02736-s001.zip › TableS2.xlsx]

## Sheet: Table S2
Reference	Accession	Monoecious/Dioecious	Country	Sex	Sex test method	Chromosome number	Instrument used	Stain used	Buffer	Standard	GS (pg/2C)	SD	CV %	No of individuals or measurements	Notes
Faux et al., 2014	Carmagnola	D	Cultivar	M	MADC2		LSRFortessa cell analyser	PI	Otto II	Glycine max (2.41 ± 0.170 pg/2C)	1.835	0.019	2.6-5	4
Faux et al., 2015	Carmagnola	D	Cultivar	F	MADC2		LSRFortessa cell analyser	PI	Otto II	Glycine max (2.41 ± 0.170 pg/2C)	1.789	0.019	2.6-5	6
Faux et al., 2016	Uso 31	M	Cultivar	Mo	MADC2		LSRFortessa cell analyser	PI	Otto II	Glycine max (2.41 ± 0.170 pg/2C)	1.791	0.017	2.6-5	9
Faux et al., 2017	Fedora 17	M	Cultivar	Mo	MADC2		LSRFortessa cell analyser	PI	Otto II	Glycine max (2.41 ± 0.170 pg/2C)	1.791	0.017	2.6-5	9
Faux et al., 2018	Santhica 27	M	Cultivar	Mo	MADC2		LSRFortessa cell analyser	PI	Otto II	Glycine max (2.41 ± 0.170 pg/2C)	1.791	0.017	2.6-5	8
Faux et al., 2019	Felina 32	M	Cultivar	Mo	MADC2		LSRFortessa cell analyser	PI	Otto II	Glycine max (2.41 ± 0.170 pg/2C)	1.791	0.017	2.6-5	10
Faux et al., 2020	Epsilon 68	M	Cultivar	Mo	MADC2		LSRFortessa cell analyser	PI	Otto II	Glycine max (2.41 ± 0.170 pg/2C)	1.791	0.017	2.6-5	9
Faux et al., 2021	Carmagnola	D	Cultivar	M	MADC2		LSRFortessa cell analyser	PI	Otto II	Zea mays (5.57 ± 0.146 pg/2C)	1.883	0.018	2.6-5	4
Faux et al., 2022	Carmagnola	D	Cultivar	F	MADC2		LSRFortessa cell analyser	PI	Otto II	Zea mays (5.57 ± 0.146 pg/2C)	1.835	0.017	2.6-5	6
Faux et al., 2023	Uso 31	M	Cultivar	Mo	MADC2		LSRFortessa cell analyser	PI	Otto II	Zea mays (5.57 ± 0.146 pg/2C)	1.838	0.02	2.6-5	9
Faux et al., 2024	Fedora 17	M	Cultivar	Mo	MADC2		LSRFortessa cell analyser	PI	Otto II	Zea mays (5.57 ± 0.146 pg/2C)	1.838	0.02	2.6-5	9
Faux et al., 2025	Santhica 27	M	Cultivar	Mo	MADC2		LSRFortessa cell analyser	PI	Otto II	Zea mays (5.57 ± 0.146 pg/2C)	1.838	0.02	2.6-5	8
Faux et al., 2026	Felina 32	M	Cultivar	Mo	MADC2		LSRFortessa cell analyser	PI	Otto II	Zea mays (5.57 ± 0.146 pg/2C)	1.838	0.02	2.6-5	10
Faux et al., 2027	Epsilon 68	M	Cultivar	Mo	MADC2		LSRFortessa cell analyser	PI	Otto II	Zea mays (5.57 ± 0.146 pg/2C)	1.838	0.02	2.6-5	9
Lee et al., 2003	0127-98-200 (C006) (var. Indica)		Czech	M			FACSCalibur system	PI	Tris_MgCl2 buffer	Glycine max 'Polanka' (2.50 pg/2C)	1.42	0.04		1	plant with single leaflets
Lee et al., 2003	0128-98-200 (C007)		Germany				FACSCalibur system	PI	Tris_MgCl2 buffer	Glycine max 'Polanka' (2.50 pg/2C)	1.49	0.06		1
Lee et al., 2003	0132-98-200 (C011)		Germany	M			FACSCalibur system	PI	Tris_MgCl2 buffer	Glycine max 'Polanka' (2.50 pg/2C)	1.55	0.05		1
Lee et al., 2003	0132-98-200 (C011)		Germany	M			FACSCalibur system	PI	Tris_MgCl2 buffer	Glycine max 'Polanka' (2.50 pg/2C)	1.54	0.08		1
Lee et al., 2003	0132-98-200 (C011)		Germany	M			FACSCalibur system	PI	Tris_MgCl2 buffer	Glycine max 'Polanka' (2.50 pg/2C)	1.51	0.07		1
Lee et al., 2003	0132-98-200 (C011)		Germany	M			FACSCalibur system	PI	Tris_MgCl2 buffer	Glycine max 'Polanka' (2.50 pg/2C)	1.48	0.07		1
Lee et al., 2003	0149-98-200 (C028)		Germany			20	FACSCalibur system	PI	Tris_MgCl2 buffer	Glycine max 'Polanka' (2.50 pg/2C)	1.52	0.07		1
Lee et al., 2003	0151-98-200 (C030)		Germany	M			FACSCalibur system	PI	Tris_MgCl2 buffer	Glycine max 'Polanka' (2.50 pg/2C)	1.91	0.06		1
Lee et al., 2003	0151-98-200 (C030)		Germany	F			FACSCalibur system	PI	Tris_MgCl2 buffer	Glycine max 'Polanka' (2.50 pg/2C)	1.8	0.06		1
Lee et al., 2003	0151-98-200 (C030)		Germany	F			FACSCalibur system	PI	Tris_MgCl2 buffer	Glycine max 'Polanka' (2.50 pg/2C)	1.8	0.06		1
Lee et al., 2003	0189-98-200 (C070)		Germany	M		20	FACSCalibur system	PI	Tris_MgCl2 buffer	Glycine max 'Polanka' (2.50 pg/2C)	1.57	0.05		1
Lee et al., 2003	0189-98-200 (C070)		Germany	F			FACSCalibur system	PI	Tris_MgCl2 buffer	Glycine max 'Polanka' (2.50 pg/2C)	1.5	0.06		1
Lee et al., 2003	0189-98-200 (C070)		Germany	F			FACSCalibur system	PI	Tris_MgCl2 buffer	Glycine max 'Polanka' (2.50 pg/2C)	1.42	0.05		1
Lee et al., 2003	0126-98-200 (C005)		Hungary			20	FACSCalibur system	PI	Tris_MgCl2 buffer	Glycine max 'Polanka' (2.50 pg/2C)	1.62	0.06		1
Lee et al., 2003	0126-98-200 (C005)		Hungary				FACSCalibur system	PI	Tris_MgCl2 buffer	Glycine max 'Polanka' (2.50 pg/2C)	1.61	0.06		1
Lee et al., 2003	0131-98-200 (C010)		Iran	M		20	FACSCalibur system	PI	Tris_MgCl2 buffer	Glycine max 'Polanka' (2.50 pg/2C)	1.66	0.05		1
Lee et al., 2003	0131-98-200 (C010)		Iran	M			FACSCalibur system	PI	Tris_MgCl2 buffer	Glycine max 'Polanka' (2.50 pg/2C)	1.62	0.05		1
Lee et al., 2003	0131-98-200 (C010)		Iran				FACSCalibur system	PI	Tris_MgCl2 buffer	Glycine max 'Polanka' (2.50 pg/2C)	1.73	0.14		1
Lee et al., 2003	0131-98-200 (C010)		Iran				FACSCalibur system	PI	Tris_MgCl2 buffer	Glycine max 'Polanka' (2.50 pg/2C)	1.64	0.07		1
Lee et al., 2003	0136-98-102 (C015) Cv. Tochigishiro		Japan				FACSCalibur system	PI	Tris_MgCl2 buffer	Glycine max 'Polanka' (2.50 pg/2C)	1.72	0.05		1
Lee et al., 2003	0137-98-102 (C016) CBDA strain		Japan			20	FACSCalibur system	PI	Tris_MgCl2 buffer	Glycine max 'Polanka' (2.50 pg/2C)	1.77	0.13		1
Lee et al., 2003	0137-98-102 (C016) CBDA strain		Japan				FACSCalibur system	PI	Tris_MgCl2 buffer	Glycine max 'Polanka' (2.50 pg/2C)	1.73	0.12		1
Lee et al., 2003	0137-98-102 (C016) CBDA strain		Japan	M		20	FACSCalibur system	PI	Tris_MgCl2 buffer	Glycine max 'Polanka' (2.50 pg/2C)	1.95	0.03		1
Lee et al., 2003	0178-98-050 (C059)		Japan	M			FACSCalibur system	PI	Tris_MgCl2 buffer	Glycine max 'Polanka' (2.50 pg/2C)	1.93	0.05		1
Lee et al., 2003	0134-98-102 (C012)		Mexico	M			FACSCalibur system	PI	Tris_MgCl2 buffer	Glycine max 'Polanka' (2.50 pg/2C)	1.78	0.08		1
Lee et al., 2003	0134-98-102 (C012)		Mexico				FACSCalibur system	PI	Tris_MgCl2 buffer	Glycine max 'Polanka' (2.50 pg/2C)	1.79	0.11		1
Lee et al., 2003	0134-98-102 (C012)		Mexico				FACSCalibur system	PI	Tris_MgCl2 buffer	Glycine max 'Polanka' (2.50 pg/2C)	1.79	0.06		1
Lee et al., 2003	0137-98-200 (C009)		Poland	M		20	FACSCalibur system	PI	Tris_MgCl2 buffer	Glycine max 'Polanka' (2.50 pg/2C)	1.67	0.05		1
Lee et al., 2003	0137-98-200 (C009)		Poland	F			FACSCalibur system	PI	Tris_MgCl2 buffer	Glycine max 'Polanka' (2.50 pg/2C)	1.57	0.05		1
Lee et al., 2003	0137-98-200 (C009)		Poland	F			FACSCalibur system	PI	Tris_MgCl2 buffer	Glycine max 'Polanka' (2.50 pg/2C)	1.55	0.05		1
Lee et al., 2003	0183-98-200 (C064)		Poland	M			FACSCalibur system	PI	Tris_MgCl2 buffer	Glycine max 'Polanka' (2.50 pg/2C)	1.8	0.06		1
Lee et al., 2003	0183-98-200 (C064)		Poland	F			FACSCalibur system	PI	Tris_MgCl2 buffer	Glycine max 'Polanka' (2.50 pg/2C)	1.75	0.09		1
Lee et al., 2003	0183-98-200 (C064)		Poland	F			FACSCalibur system	PI	Tris_MgCl2 buffer	Glycine max 'Polanka' (2.50 pg/2C)	1.75	0.06		1
Lee et al., 2003	0183-98-200 (C064)		Poland	F			FACSCalibur system	PI	Tris_MgCl2 buffer	Glycine max 'Polanka' (2.50 pg/2C)	1.75	0.05		1
Lee et al., 2003	0183-98-200 (C064)		Poland				FACSCalibur system	PI	Tris_MgCl2 buffer	Glycine max 'Polanka' (2.50 pg/2C)	1.79	0.11		1
Sakamoto et al., 1998	Cv. Tochigishiro		Cultivar	F		20	Partec PA Flow cytometer	DAPI	High resolution DNA kit type P: Partec GMBH	Arabidopsis thaliana (260 Mbp/2C)	1636 Mbp (1.673 pg/2C)	7.2	1.8-2.5	6 measurements
Sakamoto et al., 1998	Cv. Tochigishiro		Cultivar	M		20	Partec PA Flow cytometer	DAPI	High resolution DNA kit type P: Partec GMBH	Arabidopsis thaliana (260 Mbp/2C)	1683 Mbp (1.721 pg/2C)	13.9	1.3-2.9	6 measurements
Kubešová et al., 2010	Naturalised		Czech Republic				Partec CyFlow SL cytometer	PI	Otto II	Solanum lycopersicum 'Stupické polní rané' (1.90 pg/2C)	1.81	0.01		3 times on different days only analyses with a between-day fluctuation below 3% were considered	48°54'27.7'' 16°59'06.1'' field edge, 3.2 km ENE of the Čejkovice church /and /48°47'22.7'' 16°42'26.6'' field edge, 1.8 km NNE of the railway station Sedlec
Parsons et al., 2019	THC/CBD indica-dominant hybrid strain (Strain 2) - Diploid		Cultivar	F		20	Gallios flow cytometer	PI	LB01	Raphanus sativa 'Saxa' (2C = 1.11 pg/2C)	1.97	0.04		3	measured on 3 non-consecutive days to ensure accuracy
Parsons et al., 2019	THC/CBD indica-dominant hybrid strain (Strain 2) - Tetraploid		Cultivar	F		40	Gallios flow cytometer	PI	LB01	Raphanus sativa 'Saxa' (2C = 1.11 pg/2C)	3.93	0.23		3	measured on 3 non-consecutive days to ensure accuracy
