# Supplementary material for: Novel Insights into the Nature of Intraspecific Genome Size Diversity in Cannabis sativa L
Source: Plants (Basel). 2022 Oct 16;11(20):2736. doi: 10.3390/plants11202736 (PMC9607409; doi:10.3390/plants11202736)
Supplement: Supplementary file 1 [file plants-11-02736-s001.zip › TableS3.xlsx]

## Sheet: Table S3
Accession	Individual	Sex	Genome size (pg/2C)
			Measurement 1	Measurement 2	Measurement 3	Measurement 6	Measurement 7	Measurement 8
Armenia 3	AM3.31	F	1.97803		1.92967	1.96088
Armenia 3	AM3.33	F	2.03487		1.91251	1.95908
Armenia 3	AM3.34	F			1.93673
Armenia 3	AM3.32	M			1.98852	1.9731		1.97856
Hungary 11	HU11.33	F				1.93092	1.91735
Hungary 11	HU11.34	F					1.90279
Hungary 11	HU11.31	M			1.94217	1.92242	1.97329	1.97027
Hungary 11	HU11.32	M					1.92308
Morocco	MAR.32	F			1.94471
Morocco	MAR.33	F			1.90442
Morocco	MAR.34	F			1.9685			1.96378
Morocco	MAR.31	M				2.00225		2.02066
Morocco	MAR.35	M			1.97848
Mongolia 3	MN3.33	F						1.94656
Mongolia 3	MN3.34	F						1.90762
Mongolia 3	MN3.31	M			1.92236	1.97759
Mongolia 3	MN3.32	M			1.87308	2.00223		1.92853
Romania 2	RO2.31	F		1.94847		1.86501	1.90482	1.90012
Romania 2	RO2.32	F						1.86107
