# Supplementary material for: Novel Insights into the Nature of Intraspecific Genome Size Diversity in Cannabis sativa L
Source: Plants (Basel). 2022 Oct 16;11(20):2736. doi: 10.3390/plants11202736 (PMC9607409; doi:10.3390/plants11202736)
Supplement: Supplementary file 1 [file plants-11-02736-s001.zip › TableS4.xlsx]

## Sheet: Table S4
Accession	Individual	GS_mean	SD_GS	CV_mean	SD_CV	Sex	Area B
AM1	AM1.1	2.04045	0.00148945	3.785	0.360624	NA	W Asia
AM1	AM1.11	2.01103	0.00612174	3.185	0.304056	NA	W Asia
AM1	AM1.13	2.02543	0.00228069	3.05	0	NA	W Asia
AM1	AM1.14	2.05085	0.00765488	3.715	0.431335	NA	W Asia
AM1	AM1.15	2.04493	0.0119794	3.475	0.0919239	NA	W Asia
AM1	AM1.2	2.03126	0.00588825	3.145	0.00707107	NA	W Asia
AM1	AM1.3	1.98727	0.013302	3.14	0.311127	NA	W Asia
AM1	AM1.4	2.04946	0.0187224	3.81	0.579828	NA	W Asia
AM1	AM1.5	2.00908	0.0122034	2.87	0.19799	NA	W Asia
AM12	AM12.1	2.01679	0.0162372	3.52	0.311127	NA	W Asia
AM12	AM12.2	1.95545	0.0189515	3.02	0.0424264	NA	W Asia
AM12	AM12.3	1.96344	0.00221238	2.615	0.0919239	NA	W Asia
AM12	AM12.4	1.92853	0.00893651	3.33	0.0282843	NA	W Asia
AM12	AM12.5	1.87287	0.0149213	3.225	0.0636396	NA	W Asia
AM14	AM14.1	2.09403	0.00305453	4.055	0.190919	NA	W Asia
AM14	AM14.2	2.00869	0.00671791	3.67	0.339411	NA	W Asia
AM14	AM14.3	2.04006	0.00593186	3.75	0.254558	NA	W Asia
AM14	AM14.4	1.96172	0.00629478	3.595	0.205061	NA	W Asia
AM14	AM14.5	1.97093	0.0219585	3.23	0.0141421	NA	W Asia
AM15	AM15.1	1.9156	0.00168862	3.465	0.0212132	F	W Asia
AM15	AM15.13	2.15206	0.00789674	4.07	0.636396	F	W Asia
AM15	AM15.16	2.0791	0.00639669	3.55	0	NA	W Asia
AM15	AM15.2	1.95707	0.00614591	3.035	0.120208	F	W Asia
AM15	AM15.3	1.9269	0.00738483	2.86	0.0565685	M	W Asia
AM15	AM15.4	1.94358	0.0109612	3.11	0.0424264	M	W Asia
AM15	AM15.5	1.95558	0.00902791	3.13	0.169706	M	W Asia
AM15	AM15.50	2.05792	0.0288198	3.945	0.0636396	F	W Asia
AM17	AM17.1	2.00717	0.0117769	2.88	0.0565685	NA	W Asia
AM17	AM17.2	1.93508	0.00339655	2.665	0.0212132	NA	W Asia
AM17	AM17.3	1.94179	0.00935647	2.685	0.0353553	NA	W Asia
AM17	AM17.4	1.94348	0.00135578	2.67	0.155563	NA	W Asia
AM17	AM17.5	1.99385	0.00669414	3.085	0.0353553	NA	W Asia
AM18	AM18.1	1.97127	0.0143666	3.32	0.0424264	NA	W Asia
AM18	AM18.11	1.94098	0.0475231	3.805	0.813173	NA	W Asia
AM18	AM18.2	1.99412	0.0108787	3.21	0.0424264	NA	W Asia
AM18	AM18.4	2.04473	0.00806237	3.135	0.106066	M	W Asia
AM18	AM18.5	1.95429	0.0102048	2.88	0.127279	NA	W Asia
AM20	AM20.1	1.96673	0.0108516	3.35	0.0282843	NA	W Asia
AM20	AM20.2	1.92743	0.00590749	3.295	0.0212132	NA	W Asia
AM20	AM20.4	1.93684	0.00608839	3.135	0.162635	NA	W Asia
AM20	AM20.5	1.99183	0.00466988	3.235	0.26163	NA	W Asia
AM20	AM20.6	1.96632	0.00727074	3.515	0.106066	NA	W Asia
AM3	AM3.1	1.97804	0.00377461	3.125	0.106066	NA	W Asia
AM3	AM3.2	1.97955	0.0126129	3.33	0.282843	NA	W Asia
AM3	AM3.3	2.03502	0.0157941	3.745	0.190919	NA	W Asia
AM3	AM3.31	1.93299	0.00412333	3.635	0.233345	F	W Asia
AM3	AM3.32	1.98885	0.00509966	3.37	0.169706	M	W Asia
AM3	AM3.33	1.91258	0.0150683	3.495	0.289914	F	W Asia
AM3	AM3.34	1.93676	0.000958128	3.41	0.212132	F	W Asia
AM3	AM3.4	2.00029	0.0159667	3.3	0.0565685	NA	W Asia
AM3	AM3.5	2.03312	0.00275311	2.875	0.0636396	NA	W Asia
AM4	AM4.1	1.93245	0.00836832	3.48	0.0141421	NA	W Asia
AM4	AM4.11	1.99254	0.00130574	3.305	0.360624	M	W Asia
AM4	AM4.2	1.93162	0.0105807	3.35	0.296985	NA	W Asia
AM4	AM4.4	1.98262	0.0148065	3.485	0.190919	NA	W Asia
AM4	AM4.5	1.96806	0.0158526	3.935	0.106066	NA	W Asia
AM5	AM5.1	2.01291	0.0105147	3.345	0.403051	NA	W Asia
AM5	AM5.2	2.03055	0.00230541	3.44	0.155563	NA	W Asia
AM5	AM5.3	1.97576	0.0102891	3.61	0.226274	NA	W Asia
AM5	AM5.4	1.96396	0.00701628	3.325	0.247487	NA	W Asia
AM5	AM5.5	2.01118	0.00188445	2.9	0.169706	NA	W Asia
AM6	AM6.1	1.89661	0.000559462	3.545	0.0494975	NA	W Asia
AM6	AM6.11	1.98709	0.0254423	3.225	0.0212132	NA	W Asia
AM6	AM6.12	2.02122	0.0106852	3.59	0.127279	NA	W Asia
AM6	AM6.13	1.952	0.0244119	3.325	0.233345	NA	W Asia
AM6	AM6.15	1.99472	0.0298493	3.86	0.169706	NA	W Asia
AM6	AM6.2	1.90016	0.000609643	3.53	0.0707107	NA	W Asia
AM6	AM6.4	1.92058	0.00871451	3.45	0.367696	NA	W Asia
AM6	AM6.5	1.9047	0.009928	3.69	0.0565685	NA	W Asia
AM6	AM6.50	1.92802	0.00979004	3.66	0.155563	NA	W Asia
AM9	AM9.1	1.94605	0.0105665	3.01	0.212132	NA	W Asia
AM9	AM9.2	1.95017	0.0328234	3.095	0.0777817	NA	W Asia
AM9	AM9.3	1.98966	0.0209049	3.985	0.190919	NA	W Asia
AM9	AM9.4	1.98653	0.0224881	3.585	0.318198	NA	W Asia
AM9	AM9.5	1.89411	0.0220692	3.51	0.325269	NA	W Asia
BG1	BG1.12	1.98862	0.0099924	3.835	0.219203	NA	SE Europe
BG1	BG1.2	1.93223	0.0179672	3.255	0.106066	NA	SE Europe
BG1	BG1.3	1.99183	0.0162573	3.55	0.0282843	NA	SE Europe
BG1	BG1.6	1.9751	0.0181226	4.535	0.346482	NA	SE Europe
BG1	BG1.7	1.97219	0.00098834	3.59	0.438406	NA	SE Europe
BG10	BG10.12	1.95714	0.00277158	3.395	0.148492	NA	SE Europe
BG10	BG10.13	1.90304	0.01646	2.965	0.190919	NA	SE Europe
BG10	BG10.2	1.86857	0.00650956	3.445	0.148492	NA	SE Europe
BG10	BG10.3	1.88518	0.00909714	2.865	0.205061	NA	SE Europe
BG10	BG10.5	1.90995	0.0208313	3.405	0.148492	NA	SE Europe
BG2	BG2.1	1.93019	0.0083572	2.985	0.106066	NA	SE Europe
BG2	BG2.2	1.97013	0.0265757	4.055	0.176777	NA	SE Europe
BG2	BG2.3	1.99359	0.0010502	3.89	0.424264	NA	SE Europe
BG2	BG2.4	2.00447	0.00320383	3.92	0.254558	NA	SE Europe
BG2	BG2.5	1.91875	0.0164327	3.335	0.0494975	NA	SE Europe
BG3	BG3.1	1.94965	0.0150166	3.045	0.148492	F	SE Europe
BG3	BG3.12	1.97097	0.0224766	2.7	0.141421	NA	SE Europe
BG3	BG3.2	1.97616	0.0105649	3.31	0.169706	NA	SE Europe
BG3	BG3.3	1.96029	0.0187468	3.325	0.120208	M	SE Europe
BG3	BG3.5	2.01088	0.012363	3.73	0.155563	M	SE Europe
BG4	BG4.1	1.97638	0.0222893	3.86	0.254558	NA	SE Europe
BG4	BG4.2	1.94255	0.00906003	3.72	0.155563	NA	SE Europe
BG4	BG4.3	1.92218	0.0121382	3.87	0.141421	NA	SE Europe
BG4	BG4.4	1.88738	0.0166646	3.52	0.113137	NA	SE Europe
BG4	BG4.5	1.93327	0.00259003	3.45	0.0141421	NA	SE Europe
BG5	BG5.1	1.90896	0.0207699	3.65	0.113137	NA	SE Europe
BG5	BG5.11	1.89333	0.0168229	2.94	0.0989949	NA	SE Europe
BG5	BG5.2	1.9703	0.0220549	3.7	0.325269	NA	SE Europe
BG5	BG5.3	1.89615	0.0119038	2.665	0.106066	NA	SE Europe
BG5	BG5.4	1.90576	0.0129705	3.42	0.0565685	NA	SE Europe
CULF1	CULF1.1	1.88366	0.0186363	3.21	0.0424264	NA	FCUL
CULF1	CULF1.11	1.95864	0.00595407	3.41	0.367696	NA	FCUL
CULF1	CULF1.2	1.94526	0.00931882	4.075	0.176777	NA	FCUL
CULF1	CULF1.3	1.95073	0.014772	3.02	0.0282843	NA	FCUL
CULF1	CULF1.4	1.94425	0.0127621	3.58	0.339411	NA	FCUL
BG7	BG7.1	1.92888	0.00638116	3.785	0.0353553	NA	SE Europe
BG7	BG7.2	1.99762	0.0126601	3.535	0.0777817	NA	SE Europe
BG7	BG7.3	1.86841	0.0202117	3.3	0.0282843	NA	SE Europe
BG7	BG7.4	1.86982	0.0126837	2.86	0.0707107	NA	SE Europe
BG7	BG7.5	1.92947	0.0120526	3.045	0.106066	NA	SE Europe
BG8	BG8.1	1.92635	0.0128029	3.37	0.0424264	NA	SE Europe
BG8	BG8.2	1.98425	0.01454	3.695	0.657609	NA	SE Europe
BG8	BG8.3	1.89924	0.00414551	3.635	0.33234	NA	SE Europe
BG8	BG8.31	1.96963	0.000867276	3.87	0.0282843	M	SE Europe
BG8	BG8.32	1.96064	0.00543874	3.375	0.417193	M	SE Europe
BG8	BG8.4	1.95336	0.00138152	3.42	0.240416	NA	SE Europe
BG8	BG8.5	1.88418	0.0176832	3.075	0.0353553	NA	SE Europe
BG9	BG9.1	1.95836	0.016174	3.295	0.120208	NA	SE Europe
BG9	BG9.2	1.99538	0.0100712	3.35	0.0989949	NA	SE Europe
BG9	BG9.3	2.02476	0.00898626	3.44	0.268701	NA	SE Europe
BG9	BG9.4	2.00244	0.000257272	3.525	0.374767	NA	SE Europe
BG9	BG9.5	1.83707	0.0075782	2.67	0.0282843	NA	SE Europe
BNG	BNG.1	1.9387	0.0209095	3.045	0.0777817	NA	S Himalaya
BNG	BNG.13	1.97068	0.0124981	3.755	0.148492	M	S Himalaya
BNG	BNG.2	2.01168	0.0258714	3.26	0.0282843	NA	S Himalaya
BNG	BNG.22	1.86763	0.00207185	3.07	0.127279	M	S Himalaya
BNG	BNG.23	1.92935	0.00536161	3.405	0.120208	F	S Himalaya
BNG	BNG.3	1.94208	0.0126004	3.395	0.0919239	NA	S Himalaya
BNG	BNG.4	1.92169	0.00711049	2.83	0.0282843	NA	S Himalaya
BNG	BNG.5	1.87994	0.00749148	3.32	0.127279	M	S Himalaya
BNG	BNG.6	1.95194	0.000397855	3.48	0.0565685	NA	S Himalaya
CULF2	CULF2.1	1.95451	0.00454964	3.015	0.13435	NA	FCUL
CULF2	CULF2.2	1.95478	0.0142132	3.305	0.388909	NA	FCUL
CULF2	CULF2.3	1.92209	0.00479699	3.28	0.169706	NA	FCUL
CULF2	CULF2.4	1.9566	9.38e-08	3	0.0848528	NA	FCUL
CULF2	CULF2.5	1.9733	0.00768619	3.11	0.0424264	NA	FCUL
CULF3	CULF3.1	1.96036	0.0125231	2.775	0.0636396	NA	FCUL
CULF3	CULF3.2	1.95894	0.00629874	3.02	0.268701	NA	FCUL
CULF3	CULF3.3	2.00617	0.0166478	3.505	0.13435	NA	FCUL
CULF3	CULF3.4	1.99049	0.0092708	3.535	0.162635	NA	FCUL
CULF3	CULF3.5	1.96756	0.0274341	2.945	0.176777	NA	FCUL
CULF4	CULF4.1	1.95027	0.019908	2.72	0.127279	NA	FCUL
CULF4	CULF4.11	1.99691	0.0187926	4.095	0.162635	NA	FCUL
CULF4	CULF4.15	2.03918	0.0249755	4.3	0.0707107	NA	FCUL
CULF4	CULF4.2	1.94516	0.0168793	2.94	0.183848	NA	FCUL
CULF4	CULF4.3	1.932	0.0169142	2.68	0.127279	NA	FCUL
CULF4	CULF4.4	1.95915	0.00117647	3.365	0.120208	NA	FCUL
CULF4	CULF4.5	1.9168	0.0143442	2.915	0.0212132	NA	FCUL
CULF5	CULF5.1	1.91404	0.0157184	3.085	0.346482	NA	FCUL
CULF5	CULF5.2	1.88873	0.0226506	2.9	0.0141421	NA	FCUL
CULF5	CULF5.3	1.9836	0.00168428	3.295	0.205061	NA	FCUL
CULF5	CULF5.32	1.98796	0.0147835	3.225	0.0353553	F	FCUL
CULF5	CULF5.34	1.95473	6.76e-05	3.86	0.0282843	M	FCUL
CULF5	CULF5.4	1.95823	0.0101714	3.02	0	NA	FCUL
CULF5	CULF5.5	1.94144	0.00337648	2.925	0.0636396	NA	FCUL
CAM	CAM.1	2.00682	0.00470525	3.485	0.289914	F	S Asia
CAM	CAM.11	2.05145	0.00380779	3.745	0.13435	M	S Asia
CAM	CAM.13	2.02253	0.0173564	3.725	0.0636396	M	S Asia
CAM	CAM.14	2.0733	0.0025079	3.675	0.26163	F	S Asia
CAM	CAM.2	2.03404	0.0184509	3.885	0.0919239	M	S Asia
CAM	CAM.3	2.08111	0.00324379	3.44	0.622254	M	S Asia
CAM	CAM.4	2.00267	0.0138424	3.71	0.183848	F	S Asia
CAM	CAM.5	2.00178	0.000706002	3.49	0.0707107	M	S Asia
CAM	CAM.50	1.98594	0.0199426	4	0.240416	M	S Asia
CAM	CAM.60	1.91322	0.0021259	3.49	0.0707107	F	S Asia
ETH	ETH.1	1.96324	0.0104706	3.125	0.13435	NA	E Africa
ETH	ETH.2	1.99848	0.0154079	3.365	0.13435	NA	E Africa
ETH	ETH.3	1.98809	0.00746851	2.985	0.00707107	NA	E Africa
ETH	ETH.32	2.021	0.00502375	3.315	0.318198	M	E Africa
ETH	ETH.33	2.0264	0.0029518	3.755	0.318198	M	E Africa
ETH	ETH.5	1.9394	0.000613574	3.13	0.169706	NA	E Africa
ETH	ETH.6	1.93758	0.014446	3.035	0.176777	NA	E Africa
GHA	GHA.1	1.91365	0.00252258	3.225	0.0777817	M	W Africa
GHA	GHA.2	1.98204	0.0186866	4.305	0.516188	NA	W Africa
GHA	GHA.3	2.05084	0.00104961	3.36	0.127279	NA	W Africa
GHA	GHA.4	1.92403	0.00715014	3.61	0.240416	NA	W Africa
GHA	GHA.5	1.99277	0.000594948	3.055	0.26163	NA	W Africa
GHA	GHA.6	2.00823	0.0211132	4.4	0.254558	NA	W Africa
GHA	GHA.8	1.95594	0.0105145	3.975	0.205061	NA	W Africa
GM	GM.1	1.95361	0.00863561	3.08	0.0565685	NA	W Africa
GM	GM.2	1.92466	0.00692464	3.55	0.0424264	NA	W Africa
GM	GM.3	1.96853	0.0131582	3.325	0.106066	NA	W Africa
GM	GM.4	1.93302	0.00525712	3.77	0.19799	NA	W Africa
GM	GM.5	1.85813	0.00358517	3.03	0.311127	NA	W Africa
GM	GM.50	1.97386	0.00134566	3.985	0.13435	NA	W Africa
HU1	HU1.1	1.93911	0.0223548	3.655	0.148492	NA	SE Europe
HU1	HU1.2	1.98093	0.0184304	3.84	0.0989949	M	SE Europe
HU1	HU1.3	1.97822	0.0291443	3.945	0.502046	NA	SE Europe
HU1	HU1.5	1.97511	0.00108807	3.57	0.240416	NA	SE Europe
HU1	HU1.6	1.94425	0.0076702	3	0.226274	NA	SE Europe
HU10	HU10.1	1.91123	0.00192468	4.475	0.13435	NA	SE Europe
HU10	HU10.2	1.97397	0.00416087	3.51	0.438406	NA	SE Europe
HU10	HU10.3	1.92342	0.000710042	3.43	0.268701	NA	SE Europe
HU10	HU10.4	1.98684	0.00459089	3.41	0.339411	NA	SE Europe
HU10	HU10.5	2.00567	0.0070178	3.645	0.417193	NA	SE Europe
HU11	HU11.1	1.85106	0.0119044	2.725	0.00707107	NA	SE Europe
HU11	HU11.11	1.90164	0.00584399	3.83	0.0989949	F	SE Europe
HU11	HU11.13	1.92935	0.00407324	3.345	0.0636396	NA	SE Europe
HU11	HU11.14	1.92217	0.00154148	3.02	0.155563	NA	SE Europe
HU11	HU11.18	1.90505	0.025534	4.555	0.26163	NA	SE Europe
HU11	HU11.2	1.91544	0.016611	3.415	0.148492	NA	SE Europe
HU11	HU11.31	1.92237	0.0472156	3.16	0.0565685	M	SE Europe
HU11	HU11.32	1.92288	0.00106838	2.965	0.190919	M	SE Europe
HU11	HU11.33	1.93191	0.00225756	3.665	0.417193	F	SE Europe
HU11	HU11.34	1.90458	0.0139858	3.245	0.700036	F	SE Europe
HU12	HU12.1	1.86152	0.00788405	3.325	0.0494975	NA	SE Europe
HU12	HU12.2	1.99093	0.00942526	4.23	0.212132	NA	SE Europe
HU12	HU12.3	1.86621	0.00482056	3.485	0.0919239	NA	SE Europe
HU12	HU12.4	1.95534	0.00283071	4.46	0.127279	NA	SE Europe
HU12	HU12.5	2.01903	0.0241555	3.655	0.120208	NA	SE Europe
HU2	HU2.11	1.89814	0.0105954	3.505	0.0636396	NA	SE Europe
HU2	HU2.12	1.99387	0.00177486	3.275	0.346482	NA	SE Europe
HU2	HU2.14	1.9511	0.0184342	3.085	0.0494975	NA	SE Europe
HU2	HU2.2	2.02476	0.0246709	3.81	0.0141421	NA	SE Europe
HU2	HU2.3	1.92383	0.00753764	3.81	0.155563	NA	SE Europe
HU2	HU2.4	1.91691	0.00345341	3.56	0.127279	NA	SE Europe
HU3	HU3.1	1.95408	0.0138098	4.115	0.473762	NA	SE Europe
HU3	HU3.11	1.94704	0.000351569	3.045	0.00707107	M	SE Europe
HU3	HU3.12	1.85998	0.00511269	2.935	0.00707107	F	SE Europe
HU3	HU3.16	1.94902	0.00738419	3.455	0.00707107	NA	SE Europe
HU3	HU3.2	1.98481	0.00930584	3.175	0.304056	NA	SE Europe
HU4	HU4.1	1.95001	0.00746356	4.205	0.346482	NA	SE Europe
HU4	HU4.2	2.00335	0.00691898	3.305	0.00707107	NA	SE Europe
HU4	HU4.3	1.9517	0.00917211	3.3	0.0141421	NA	SE Europe
HU4	HU4.4	1.98623	0.00853563	3.615	0.13435	NA	SE Europe
HU4	HU4.5	2.0094	0.0263941	3.485	0.13435	M	SE Europe
HU5	HU5.1	1.87818	0.00911055	3.96	0.353553	NA	SE Europe
HU5	HU5.13	1.95193	0.00964786	3.365	0.148492	NA	SE Europe
HU5	HU5.2	1.89876	0.00930032	3.635	0.0777817	NA	SE Europe
HU5	HU5.3	1.91366	0.0108513	3.525	0.0353553	NA	SE Europe
HU5	HU5.4	1.85691	0.00479301	3.005	0.0777817	NA	SE Europe
HU6	HU6.1	1.94665	0.00881671	3.285	0.0777817	NA	SE Europe
HU6	HU6.2	1.90464	0.00504878	3.015	0.219203	NA	SE Europe
HU6	HU6.3	2.01794	0.0157702	3.89	0.254558	NA	SE Europe
HU6	HU6.4	1.94684	0.0119035	3.04	0.254558	NA	SE Europe
HU6	HU6.5	1.98879	0.0141093	3.4	0.183848	NA	SE Europe
HU7	HU7.1	1.90153	0.01966	3.315	0.162635	NA	SE Europe
HU7	HU7.2	1.95852	0.0121602	3.665	0.0636396	NA	SE Europe
HU7	HU7.3	1.93025	0.0169821	3.775	0.0636396	NA	SE Europe
HU7	HU7.31	1.90976	0.0034476	4.51	0.169706	F	SE Europe
HU7	HU7.4	1.91445	0.00623096	3.685	0.33234	NA	SE Europe
HU7	HU7.5	2.02241	0.0098981	3.55	0.212132	NA	SE Europe
HU7	HU7.50	1.952	0.00699459	4.495	0.0353553	NA	SE Europe
HU7	HU7.7	1.88997	0.0181907	3.07	0.169706	NA	SE Europe
HU8	HU8.1	1.99998	0.00185445	3.51	0.127279	NA	SE Europe
HU8	HU8.12	1.92331	0.00238629	3.615	0.360624	NA	SE Europe
HU8	HU8.13	1.90868	0.00932668	3.325	0.374767	NA	SE Europe
HU8	HU8.14	1.99028	0.00528796	2.67	0.254558	NA	SE Europe
HU8	HU8.2	1.95525	0.00106901	2.875	0.0636396	NA	SE Europe
HU8	HU8.3	1.95661	0.0109237	3.235	0.0494975	NA	SE Europe
HU9	HU9.1	1.92032	0.00337166	3.465	0.162635	M	SE Europe
HU9	HU9.11	1.96785	0.00533393	4.035	0.0919239	F	SE Europe
HU9	HU9.12	1.96583	0.0121603	4.125	0.289914	M	SE Europe
HU9	HU9.13	1.95255	0.0285827	3.495	0.13435	F	SE Europe
HU9	HU9.14	2.03133	0.0237371	3.975	0.445477	M	SE Europe
HU9	HU9.15	2.07213	0.0157452	4.25	0.0565685	M	SE Europe
HU9	HU9.2	1.95946	0.000119974	3.695	0.304056	F	SE Europe
HU9	HU9.21	1.94593	0.0301526	3.59	0.268701	F	SE Europe
HU9	HU9.3	1.93641	0.0568299	4.135	0.219203	F	SE Europe
HU9	HU9.5	1.8745	0.00871901	3.175	0.106066	F	SE Europe
HU9	HU9.50	1.87778	0.000680986	3	0.141421	NA	SE Europe
IND1	IHAR.1	1.8764	0.00520192	4.315	0.0919239	NA	S Himalaya
IND1	IHAR.4	1.94879	0.010626	3.4	0.282843	M	S Himalaya
IND1	IHAR.5	1.88878	0.00652504	3.23	0.0141421	F	S Himalaya
IND2	IK.1	1.99524	0.034624	4.48	0.367696	F	S India
IND2	IK.11	2.05562	0.00308621	3.365	0.289914	M	S India
IND2	IK.12	1.95844	0.0129004	3.115	0.0636396	NA	S India
IND2	IK.13	2.03952	0.0164855	3.415	0.318198	M	S India
IND2	IK.14	1.97988	0.00271384	2.93	0.19799	M	S India
IND2	IK.15	2.06732	0.00641159	3.615	0.0353553	M	S India
IND2	IK.2	2.02348	0.0173885	4.815	0.120208	NA	S India
IND2	IK.3	2.0753	0.0192257	4.175	0.106066	F	S India
IND2	IK.4	2.04304	0.000161251	3.555	0.0777817	M	S India
IND2	IK.5	2.03169	0.0075502	3.085	0.26163	M	S India
IND3	IKL.1	1.95715	0.0162328	3.01	0	NA	S Himalaya
IND3	IKL.2	1.93562	0.014376	2.94	0.0848528	NA	S Himalaya
IND3	IKL.3	1.90173	0.00700559	3.335	0.190919	NA	S Himalaya
IND3	IKL.4	1.92992	0.00150265	3.68	0.0282843	NA	S Himalaya
IND3	IKL.5	1.98542	0.0152836	3.31	0.240416	NA	S Himalaya
IND3	IKL.50	1.88301	0.00435201	3.37	0.0989949	NA	S Himalaya
IND4	ISAT.1	2.00906	0.0111304	3.51	0.0707107	NA	S Himalaya
IND4	ISAT.11	1.99471	0.00871631	2.97	0.141421	M	S Himalaya
IND4	ISAT.12	1.96537	0.0110435	3.11	0.424264	NA	S Himalaya
IND4	ISAT.31	1.99456	0.0174715	3.42	0.254558	NA	S Himalaya
CULF6	CULF6.1	1.83382	0.00127631	3.14	0.0707107	NA	FCUL
CULF6	CULF6.12	1.89087	0.00671294	2.66	0.155563	NA	FCUL
CULF6	CULF6.16	1.93624	0.0118549	3.26	0.155563	NA	FCUL
CULF6	CULF6.17	1.95148	0.00317213	3.175	0.13435	NA	FCUL
CULF6	CULF6.18	1.95191	0.00915304	3.55	0.353553	NA	FCUL
CULF6	CULF6.3	1.9624	0.0123067	3.255	0.205061	NA	FCUL
CULF7	CULF7.1	1.97341	0.00424422	3.575	0.106066	F	FCUL
CULF7	CULF7.2	1.99328	0.00275563	3.05	0.183848	F	FCUL
CULF7	CULF7.23	1.98976	0.00177992	2.73	0.183848	F	FCUL
CULF7	CULF7.3	2.0109	0.0189294	3.34	0.0282843	M	FCUL
CULF7	CULF7.35	1.968	0.00678017	3.15	0.0565685	M	FCUL
CULF7	CULF7.4	2.03987	0.00805621	3.71	0	F	FCUL
CULF7	CULF7.5	2.02103	0.0243335	3.29	0.0848528	F	FCUL
KAZ	KAZ.1	1.94107	0.0183299	4.28	0.113137	M	C Asia
KAZ	KAZ.11	1.85921	0.00241141	2.83	0.353553	NA	C Asia
KAZ	KAZ.12	2.00573	0.00657407	2.74	0.183848	M	C Asia
KAZ	KAZ.14	1.96265	0.00559001	2.725	0.148492	F	C Asia
KAZ	KAZ.16	1.95501	0.00147064	2.935	0.233345	F	C Asia
KAZ	KAZ.2	1.87644	0.0289194	4.32	0.353553	F	C Asia
KAZ	KAZ.3	1.87414	0.0406494	4.055	0.106066	F	C Asia
KAZ	KAZ.4	1.94594	0.00602343	3.375	0.0353553	F	C Asia
KAZ	KAZ.6	1.93283	0.00392831	2.495	0.0212132	M	C Asia
KAZ	KAZ.7	1.93572	0.0268266	3.49	0.0424264	M	C Asia
KAZ	KAZ.8	1.96789	0.0385031	3.645	0.162635	M	C Asia
KAZ	KAZ.9	1.86926	0.0164002	2.99	0.127279	F	C Asia
KG1	KG1.1	1.95848	0.00649856	3.86	0.494975	NA	C Asia
KG1	KG1.2	1.83824	0.00137788	4.56	0.141421	NA	C Asia
KG1	KG1.3	1.92657	0.0126683	3.125	0.120208	NA	C Asia
KG1	KG1.4	1.89073	0.00776	3.83	0.311127	NA	C Asia
KG1	KG1.5	1.88815	0.00702403	3.465	0.0777817	NA	C Asia
KG2	KG2.1	1.93476	0.00828016	4.105	0.304056	NA	C Asia
KG2	KG2.2	1.88676	0.0011357	3.885	0.120208	NA	C Asia
KG2	KG2.3	1.91187	0.0212137	3.78	0.19799	NA	C Asia
KG2	KG2.4	1.97864	0.0039035	3.87	0.0424264	NA	C Asia
KG2	KG2.6	1.94123	0.0206735	3.275	0.233345	M	C Asia
KG2	KG2.7	1.89805	0.0049721	2.64	0.0282843	F	C Asia
KG2	KG2.8	1.94233	0.0245479	4.23	0.169706	NA	C Asia
CULF8	CULF8.1	1.97618	0.0336421	3.335	0.162635	NA	FCUL
CULF8	CULF8.13	1.94605	0.00145572	3.93	0.46669	NA	FCUL
CULF8	CULF8.2	1.91494	0.016542	2.82	0.0707107	NA	FCUL
CULF8	CULF8.3	1.93382	0.0139222	2.875	0.106066	NA	FCUL
CULF8	CULF8.4	1.90666	0.0117928	3.095	0.120208	NA	FCUL
MAR	MAR.1	1.95116	0.00708931	3.635	0.0494975	NA	N Africa
MAR	MAR.2	2.00582	0.00425296	3.235	0.233345	NA	N Africa
MAR	MAR.3	1.99953	0.00925822	3.46	0.183848	NA	N Africa
MAR	MAR.31	2.02101	0.00382927	3.165	0.0919239	M	N Africa
MAR	MAR.32	1.94457	0.00963235	3.225	0.0919239	F	N Africa
MAR	MAR.33	1.90426	0.0149091	2.765	0.0636396	F	N Africa
MAR	MAR.34	1.96423	0.00513762	3.285	0.205061	F	N Africa
MAR	MAR.35	1.92596	0.0170223	3.885	0.374767	M	N Africa
MAR	MAR.4	2.0502	0.00957293	3.33	0.0707107	NA	N Africa
MAR	MAR.5	1.97387	0.00943552	3.305	0.289914	NA	N Africa
CULD1	CULD1.1	1.89547	0.0334651	3.37	0.226274	NA	DCUL
CULD1	CULD1.2	1.97987	0.00440588	3.255	0.0777817	NA	DCUL
MN1	MN1.1	1.96864	0.00417118	3.28	0.240416	F	E Asia
MN1	MN1.2	2.05776	0.00538208	3.105	0.219203	NA	E Asia
MN1	MN1.3	2.05509	0.0230872	3.54	0.0282843	NA	E Asia
MN1	MN1.4	2.01267	0.00760127	3.645	0.0212132	M	E Asia
MN1	MN1.5	2.00499	0.0118898	4.02	0.155563	NA	E Asia
MN1	MN1.6	2.02419	0.00593036	4.205	0.190919	NA	E Asia
MN2	MN2.1	1.9754	0.0117588	3.295	0.0212132	NA	E Asia
MN2	MN2.31	1.93803	0.0337476	3.6	0.0424264	F	E Asia
MN2	MN2.32	1.99139	0.0125145	3.27	0.127279	M	E Asia
MN3	MN3.1	1.96705	0.0320879	3.815	0.0212132	NA	E Asia
MN3	MN3.2	1.99477	0.00405442	3.2	0.0707107	M	E Asia
MN3	MN3.3	2.01973	0.0198785	3.455	0.176777	M	E Asia
MN3	MN3.31	1.92207	0.0196088	3.13	0.127279	M	E Asia
MN3	MN3.32	1.92868	0.0190423	3.57	0.282843	M	E Asia
MN3	MN3.33	1.9471	0.0266502	3.23	0.169706	F	E Asia
MN3	MN3.34	1.90764	0.0114422	3.7	0.169706	F	E Asia
MN3	MN3.4	2.11813	0.00867851	3.9	0.0565685	M	E Asia
MN4	MN4.1	1.94833	0.00059345	3.435	0.120208	NA	E Asia
MN4	MN4.2	2.01101	0.019677	3.84	0.0707107	M	E Asia
MN5	MN5.1	1.97828	0.00656487	3.53	0.282843	F	E Asia
MN5	MN5.14	1.81012	0.000714859	3.525	0.219203	F	E Asia
MN5	MN5.2	2.01604	0.0111187	3.245	0.148492	M	E Asia
MN5	MN5.3	1.97878	0.0151705	3.46	0.0989949	F	E Asia
MN5	MN5.4	1.93267	0.00536887	3.33	0.113137	F	E Asia
MN6	MN6.1	1.93281	0.000559062	3.49	0.565685	NA	E Asia
MN6	MN6.2	1.84576	0.0176353	3.31	0.296985	F	E Asia
MN6	MN6.31	1.99443	0.00854968	3.26	0.0424264	M	E Asia
MN7	MN7.1	1.95567	0.0146736	3.45	0.0989949	NA	E Asia
MN7	MN7.2	2.06122	0.00862004	3.94	0.113137	NA	E Asia
MN8	MN8.1	1.91461	0.0240553	3.375	0.00707107	NA	E Asia
MN8	MN8.2	1.9694	0.00489354	3.38	0	NA	E Asia
MN9	MN9.1	1.97493	0.0131466	3.11	0.169706	NA	E Asia
MN9	MN9.2	1.93045	0.00998122	3.055	0.00707107	M	E Asia
MN9	MN9.3	1.88648	0.00544174	3.16	0.113137	NA	E Asia
MN9	MN9.4	2.00093	0.0174298	3.28	0.226274	NA	E Asia
MN9	MN9.5	1.96703	0.00372687	4.205	0.233345	M	E Asia
MN9	MN9.6	2.01754	0.00280515	3.695	0.176777	NA	E Asia
NEP1	NEP1.1	1.97593	0.0145153	3.07	0.141421	NA	S Himalaya
NEP1	NEP1.2	1.99824	0.0220618	2.845	0.0494975	NA	S Himalaya
NEP1	NEP1.3	2.04003	0.0221154	3.045	0.00707107	NA	S Himalaya
NEP1	NEP1.4	2.00989	0.0102596	3.04	0.169706	NA	S Himalaya
NEP1	NEP1.5	2.0102	0.0260385	2.72	0.452548	NA	S Himalaya
NEP2	NEP2.1	2.04684	0.00366315	3.51	0.169706	M	S Himalaya
NEP2	NEP2.2	1.97961	0.0102482	3.195	0.0212132	NA	S Himalaya
NEP2	NEP2.3	2.0085	0.0450917	4.81	0.0424264	NA	S Himalaya
NEP2	NEP2.4	1.98647	0.00483464	3.33	0.0282843	NA	S Himalaya
NEP2	NEP2.5	2.02952	0.02666	3.55	0.0565685	NA	S Himalaya
NEP3	NEP3.1	1.92783	0.0316708	3.465	0.162635	NA	S Himalaya
NEP3	NEP3.15	1.98469	0.0113005	2.8	0.183848	NA	S Himalaya
RO1	RO1.2	1.96828	0.00651126	3.33	0.0989949	NA	SE Europe
RO1	RO1.3	1.96453	0.00793118	3.31	0.0282843	NA	SE Europe
RO1	RO1.4	1.93379	0.0138972	3.77	0.0707107	NA	SE Europe
RO1	RO1.5	1.93922	0.00560079	3.45	0.0989949	NA	SE Europe
RO1	RO1.6	1.90852	0.015952	3.46	0	NA	SE Europe
RO10	RO10.13	2.00866	0.0108359	3.585	0.0494975	NA	SE Europe
RO10	RO10.2	2.02018	0.0113421	3.61	0.282843	NA	SE Europe
RO10	RO10.3	1.9244	0.0393624	3.645	0.106066	NA	SE Europe
RO10	RO10.4	1.91798	0.00922793	3.54	0.0848528	NA	SE Europe
RO2	RO2.1	1.9485	0.00145522	3.745	0.176777	NA	SE Europe
RO2	RO2.11	1.87991	0.0710667	3.6	0.183848	NA	SE Europe
RO2	RO2.2	1.94775	0.00613443	3.35	0.169706	NA	SE Europe
RO2	RO2.3	1.94742	0.0201923	2.965	0.26163	NA	SE Europe
RO2	RO2.31	1.90481	0.0142903	2.425	0.106066	F	SE Europe
RO2	RO2.32	1.85913	0.0082489	3.29	0.212132	F	SE Europe
RO2	RO2.5	1.93646	0.00482285	3.245	0.13435	NA	SE Europe
RO3	RO3.1	1.94309	0.0138721	3.425	0.289914	M	SE Europe
RO3	RO3.2	1.94404	0.0165637	2.9	0.0282843	M	SE Europe
RO3	RO3.3	1.94415	0.00836143	3.04	0.183848	M	SE Europe
RO3	RO3.4	1.93152	0.0132971	3.39	0.169706	M	SE Europe
RO3	RO3.5	1.89656	0.00159999	3.4	0.39598	F	SE Europe
RO3	RO3.6	1.97431	0.0143158	3.41	0.311127	M	SE Europe
RO4	RO4.1	1.93662	0.0203186	3.38	0.127279	NA	SE Europe
RO4	RO4.2	1.94852	0.0221176	3.59	0	NA	SE Europe
RO4	RO4.4	1.95466	0.0125667	3.17	0	NA	SE Europe
RO4	RO4.5	1.95405	0.00207218	3.165	0.72832	NA	SE Europe
RO4	RO4.50	1.9746	0.00911694	3.19	0.183848	NA	SE Europe
RO5	RO5.1	1.85697	0.00645997	3.53	0.141421	F	SE Europe
RO5	RO5.2	1.93369	0.00695485	3.94	0.155563	M	SE Europe
RO5	RO5.3	1.86546	0.002138	3.865	0.162635	F	SE Europe
RO5	RO5.4	2.00979	0.00915205	3.69	0.169706	M	SE Europe
RO5	RO5.5	1.87549	0.00414681	3.345	0.0777817	F	SE Europe
RO5	RO5.50	1.99655	0.0207557	3.16	0.0424264	M	SE Europe
RO6	RO6.1	1.93588	0.00174974	4.46	0.0424264	NA	SE Europe
RO6	RO6.12	1.93036	0.0111618	3.71	0.0282843	NA	SE Europe
RO6	RO6.2	1.9821	0.0107261	3.58	0.155563	NA	SE Europe
RO6	RO6.3	1.91676	0.00304249	3.015	0.176777	NA	SE Europe
RO6	RO6.5	1.978	0.00280878	3.05	0.212132	NA	SE Europe
RO7	RO7.1	1.93123	0.00945392	3.325	0.148492	NA	SE Europe
RO7	RO7.3	1.94518	0.0206114	2.88	0.311127	NA	SE Europe
RO7	RO7.31	1.91467	0.00660746	3.835	0.26163	F	SE Europe
RO7	RO7.32	1.943	0.00956121	3.77	0.169706	F	SE Europe
RO7	RO7.5	1.87288	0.00402569	3.305	0.176777	NA	SE Europe
RO7	RO7.6	1.90743	0.00742531	3.31	0.169706	NA	SE Europe
RO7	RO7.7	1.87528	0.00405286	2.81	0.0424264	NA	SE Europe
RO8	RO8.1	1.84095	0.000968921	2.755	0.0919239	NA	SE Europe
RO8	RO8.13	1.97453	0.0111866	3.075	0.26163	NA	SE Europe
RO8	RO8.15	1.89707	0.0104132	3.36	0.311127	NA	SE Europe
RO8	RO8.2	1.88804	0.00619175	2.57	0.183848	NA	SE Europe
RO8	RO8.5	1.84714	0.00177939	2.865	0.176777	NA	SE Europe
RO9	RO9.1	2.03761	0.00865531	3.445	0.219203	NA	SE Europe
RO9	RO9.2	2.00489	0.00307384	3.72	0.480833	NA	SE Europe
RO9	RO9.3	1.96187	0.0127546	3.555	0.0494975	NA	SE Europe
RO9	RO9.4	1.99372	0.0106032	3.315	0.0919239	NA	SE Europe
RO9	RO9.5	1.96195	0.0199927	3.415	0.0212132	NA	SE Europe
SB11	SB11.1	1.91043	0.021792	3.695	0.360624	NA	SE Europe
SB11	SB11.2	1.9173	0.00607587	3.275	0.120208	NA	SE Europe
SB11	SB11.4	1.90058	0.0116731	3.19	0.113137	NA	SE Europe
SB11	SB11.5	1.83862	0.0143332	3.105	0.148492	NA	SE Europe
SB11	SB11.7	1.88579	0.0073812	3.16	0.0424264	NA	SE Europe
SB11	SB11.8	1.98877	0.0176809	3.33	0.226274	NA	SE Europe
SB6	SB6.1	1.9757	0.00556992	2.895	0.26163	NA	SE Europe
SB6	SB6.2	1.96596	0.0104873	2.855	0.13435	NA	SE Europe
SB6	SB6.3	1.91605	0.00724532	3.09	0.113137	NA	SE Europe
SB6	SB6.4	1.90319	0.0230791	3.145	0.148492	NA	SE Europe
SB6	SB6.6	1.9424	0.00254914	2.915	0.148492	NA	SE Europe
SB8	SB8.1	1.87495	0.00580389	3.575	0.13435	NA	SE Europe
SB8	SB8.2	1.96133	0.00201047	3.03	0.0848528	NA	SE Europe
SB8	SB8.3	1.98049	0.0114642	3.22	0.169706	NA	SE Europe
SB9	SB9.1	1.89834	0.0128172	3.535	0.0353553	NA	SE Europe
SB9	SB9.11	1.9527	0.013765	3.735	0.275772	NA	SE Europe
SB9	SB9.2	1.95255	0.0112413	3.575	0.33234	NA	SE Europe
SB9	SB9.3	1.96578	0.0140724	3.63	0.0848528	NA	SE Europe
SB9	SB9.4	1.97993	0.00123573	3.825	0.00707107	NA	SE Europe
CULF9	CULF9.1	1.87524	0.00707494	2.96	0.169706	NA	FCUL
CULF9	CULF9.12	1.92963	0.0197059	3.095	0.0777817	NA	FCUL
CULF9	CULF9.2	1.94551	0.0112724	3.115	0.0919239	NA	FCUL
CULF9	CULF9.5	1.96724	0.014213	2.735	0.26163	NA	FCUL
CULF9	CULF9.50	1.84817	0.00617665	2.49	0.0707107	NA	FCUL
SLO2	SLO2.1	1.94587	0.00926484	3.265	0.00707107	NA	SE Europe
SLO2	SLO2.2	2.00526	0.0112327	3.985	0.0494975	NA	SE Europe
SLO2	SLO2.3	1.99928	0.0219504	3.56	0.240416	NA	SE Europe
SLO2	SLO2.4	1.96828	0.00786375	3.01	0.296985	NA	SE Europe
SLO2	SLO2.5	2.01672	0.00529864	3.505	0.289914	NA	SE Europe
CULF10	CULF10.1	1.99064	0.01288	2.745	0.0353553	NA	FCUL
CULF10	CULF10.2	1.99293	0.000167802	3.22	0.0565685	NA	FCUL
CULF10	CULF10.3	1.95692	0.00632457	2.87	0.0989949	NA	FCUL
CULF10	CULF10.4	1.95291	0.0167387	3.2	0	NA	FCUL
CULF10	CULF10.5	1.94429	0.00740483	3.365	0.0777817	NA	FCUL
CULF10	CULF10.50	1.95348	0.0103531	3.205	0.289914	NA	FCUL
