# Supplementary material for: Novel Insights into the Nature of Intraspecific Genome Size Diversity in Cannabis sativa L
Source: Plants (Basel). 2022 Oct 16;11(20):2736. doi: 10.3390/plants11202736 (PMC9607409; doi:10.3390/plants11202736)
Supplement: Supplementary file 1 [file plants-11-02736-s001.zip › TableS5.xlsx]

## Sheet: Table S5
Accession	Individual	GS_mean	SD_GS	CV_mean	SD_CV	Sex
AM15	AM15.1	1.9156	0.00168862	3.465	0.0212132	F
AM15	AM15.13	2.15206	0.00789674	4.07	0.636396	F
AM15	AM15.2	1.95707	0.00614591	3.035	0.120208	F
AM15	AM15.3	1.9269	0.00738483	2.86	0.0565685	M
AM15	AM15.4	1.94358	0.0109612	3.11	0.0424264	M
AM15	AM15.5	1.95558	0.00902791	3.13	0.169706	M
AM15	AM15.50	2.05792	0.0288198	3.945	0.0636396	F
AM3	AM3.31	1.93299	0.00412333	3.635	0.233345	F
AM3	AM3.32	1.98885	0.00509966	3.37	0.169706	M
AM3	AM3.33	1.91258	0.0150683	3.495	0.289914	F
AM3	AM3.34	1.93676	0.000958128	3.41	0.212132	F
BG3	BG3.1	1.94965	0.0150166	3.045	0.148492	F
BG3	BG3.3	1.96029	0.0187468	3.325	0.120208	M
BG3	BG3.5	2.01088	0.012363	3.73	0.155563	M
BG3	BG3.12	1.97097	0.0224766	2.7	0.141421	NA
CAM	CAM.1	2.00682	0.00470525	3.485	0.289914	F
CAM	CAM.11	2.05145	0.00380779	3.745	0.13435	M
CAM	CAM.13	2.02253	0.0173564	3.725	0.0636396	M
CAM	CAM.14	2.0733	0.0025079	3.675	0.26163	F
CAM	CAM.2	2.03404	0.0184509	3.885	0.0919239	M
CAM	CAM.3	2.08111	0.00324379	3.44	0.622254	M
CAM	CAM.4	2.00267	0.0138424	3.71	0.183848	F
CAM	CAM.5	2.00178	0.000706002	3.49	0.0707107	M
CAM	CAM.50	1.98594	0.0199426	4	0.240416	M
CAM	CAM.60	1.91322	0.0021259	3.49	0.0707107	F
HU11	HU11.11	1.90164	0.00584399	3.83	0.0989949	F
HU11	HU11.31	1.92237	0.0472156	3.16	0.0565685	M
HU11	HU11.32	1.92288	0.00106838	2.965	0.190919	M
HU11	HU11.33	1.93191	0.00225756	3.665	0.417193	F
HU11	HU11.34	1.90458	0.0139858	3.245	0.700036	F
HU9	HU9.1	1.92032	0.00337166	3.465	0.162635	M
HU9	HU9.11	1.96785	0.00533393	4.035	0.0919239	F
HU9	HU9.12	1.96583	0.0121603	4.125	0.289914	M
HU9	HU9.13	1.95255	0.0285827	3.495	0.13435	F
HU9	HU9.14	2.03133	0.0237371	3.975	0.445477	M
HU9	HU9.15	2.07213	0.0157452	4.25	0.0565685	M
HU9	HU9.2	1.95946	0.000119974	3.695	0.304056	F
HU9	HU9.21	1.94593	0.0301526	3.59	0.268701	F
HU9	HU9.3	1.93641	0.0568299	4.135	0.219203	F
HU9	HU9.5	1.8745	0.00871901	3.175	0.106066	F
IND2	IND2.1	1.99524	0.034624	4.48	0.367696	F
IND2	IND2.11	2.05562	0.00308621	3.365	0.289914	M
IND2	IND2.13	2.03952	0.0164855	3.415	0.318198	M
IND2	IND2.14	1.97988	0.00271384	2.93	0.19799	M
IND2	IND2.15	2.06732	0.00641159	3.615	0.0353553	M
IND2	IND2.2	2.02348	0.0173885	4.815	0.120208	NA
IND2	IND2.3	2.0753	0.0192257	4.175	0.106066	F
IND2	IND2.4	2.04304	0.000161251	3.555	0.0777817	M
IND2	IND2.5	2.03169	0.0075502	3.085	0.26163	M
CULF7	CULF7.1	1.97341	0.00424422	3.575	0.106066	F
CULF7	CULF7.2	1.99328	0.00275563	3.05	0.183848	F
CULF7	CULF7.23	1.98976	0.00177992	2.73	0.183848	F
CULF7	CULF7.3	2.0109	0.0189294	3.34	0.0282843	M
CULF7	CULF7.35	1.968	0.00678017	3.15	0.0565685	M
CULF7	CULF7.4	2.03987	0.00805621	3.71	0	F
CULF7	CULF7.5	2.02103	0.0243335	3.29	0.0848528	F
KAZ	KAZ.1	1.94107	0.0183299	4.28	0.113137	M
KAZ	KAZ.11	1.85921	0.00241141	2.83	0.353553	NA
KAZ	KAZ.12	2.00573	0.00657407	2.74	0.183848	M
KAZ	KAZ.14	1.96265	0.00559001	2.725	0.148492	F
KAZ	KAZ.16	1.95501	0.00147064	2.935	0.233345	F
KAZ	KAZ.2	1.87644	0.0289194	4.32	0.353553	F
KAZ	KAZ.3	1.87414	0.0406494	4.055	0.106066	F
KAZ	KAZ.4	1.94594	0.00602343	3.375	0.0353553	F
KAZ	KAZ.6	1.93283	0.00392831	2.495	0.0212132	M
KAZ	KAZ.7	1.93572	0.0268266	3.49	0.0424264	M
KAZ	KAZ.8	1.96789	0.0385031	3.645	0.162635	M
KAZ	KAZ.9	1.86926	0.0164002	2.99	0.127279	F
MAR	MAR.31	2.02101	0.00382927	3.165	0.0919239	M
MAR	MAR.32	1.94457	0.00963235	3.225	0.0919239	F
MAR	MAR.33	1.90426	0.0149091	2.765	0.0636396	F
MAR	MAR.34	1.96423	0.00513762	3.285	0.205061	F
MAR	MAR.35	1.92596	0.0170223	3.885	0.374767	M
MN3	MN3.2	1.99477	0.00405442	3.2	0.0707107	M
MN3	MN3.3	2.01973	0.0198785	3.455	0.176777	M
MN3	MN3.31	1.92207	0.0196088	3.13	0.127279	M
MN3	MN3.32	1.92868	0.0190423	3.57	0.282843	M
MN3	MN3.33	1.9471	0.0266502	3.23	0.169706	F
MN3	MN3.34	1.90764	0.0114422	3.7	0.169706	F
MN3	MN3.4	2.11813	0.00867851	3.9	0.0565685	M
MN5	MN5.1	1.97828	0.00656487	3.53	0.282843	F
MN5	MN5.14	1.81012	0.000714859	3.525	0.219203	F
MN5	MN5.2	2.01604	0.0111187	3.245	0.148492	M
MN5	MN5.3	1.97878	0.0151705	3.46	0.0989949	F
MN5	MN5.4	1.93267	0.00536887	3.33	0.113137	F
RO2	RO2.31	1.90481	0.0142903	2.425	0.106066	F
RO2	RO2.32	1.85913	0.0082489	3.29	0.212132	F
RO3	RO3.1	1.94309	0.0138721	3.425	0.289914	M
RO3	RO3.2	1.94404	0.0165637	2.9	0.0282843	M
RO3	RO3.3	1.94415	0.00836143	3.04	0.183848	M
RO3	RO3.4	1.93152	0.0132971	3.39	0.169706	M
RO3	RO3.5	1.89656	0.00159999	3.4	0.39598	F
RO3	RO3.6	1.97431	0.0143158	3.41	0.311127	M
RO5	RO5.1	1.85697	0.00645997	3.53	0.141421	F
RO5	RO5.2	1.93369	0.00695485	3.94	0.155563	M
RO5	RO5.3	1.86546	0.002138	3.865	0.162635	F
RO5	RO5.4	2.00979	0.00915205	3.69	0.169706	M
RO5	RO5.5	1.87549	0.00414681	3.345	0.0777817	F
RO5	RO5.50	1.99655	0.0207557	3.16	0.0424264	M
