# Supplementary figures and images for: Novel Insights into the Nature of Intraspecific Genome Size Diversity in Cannabis sativa L.
Source: MDPI journal article supplement (doi:10.3390/plants11202736), 2022-10-16

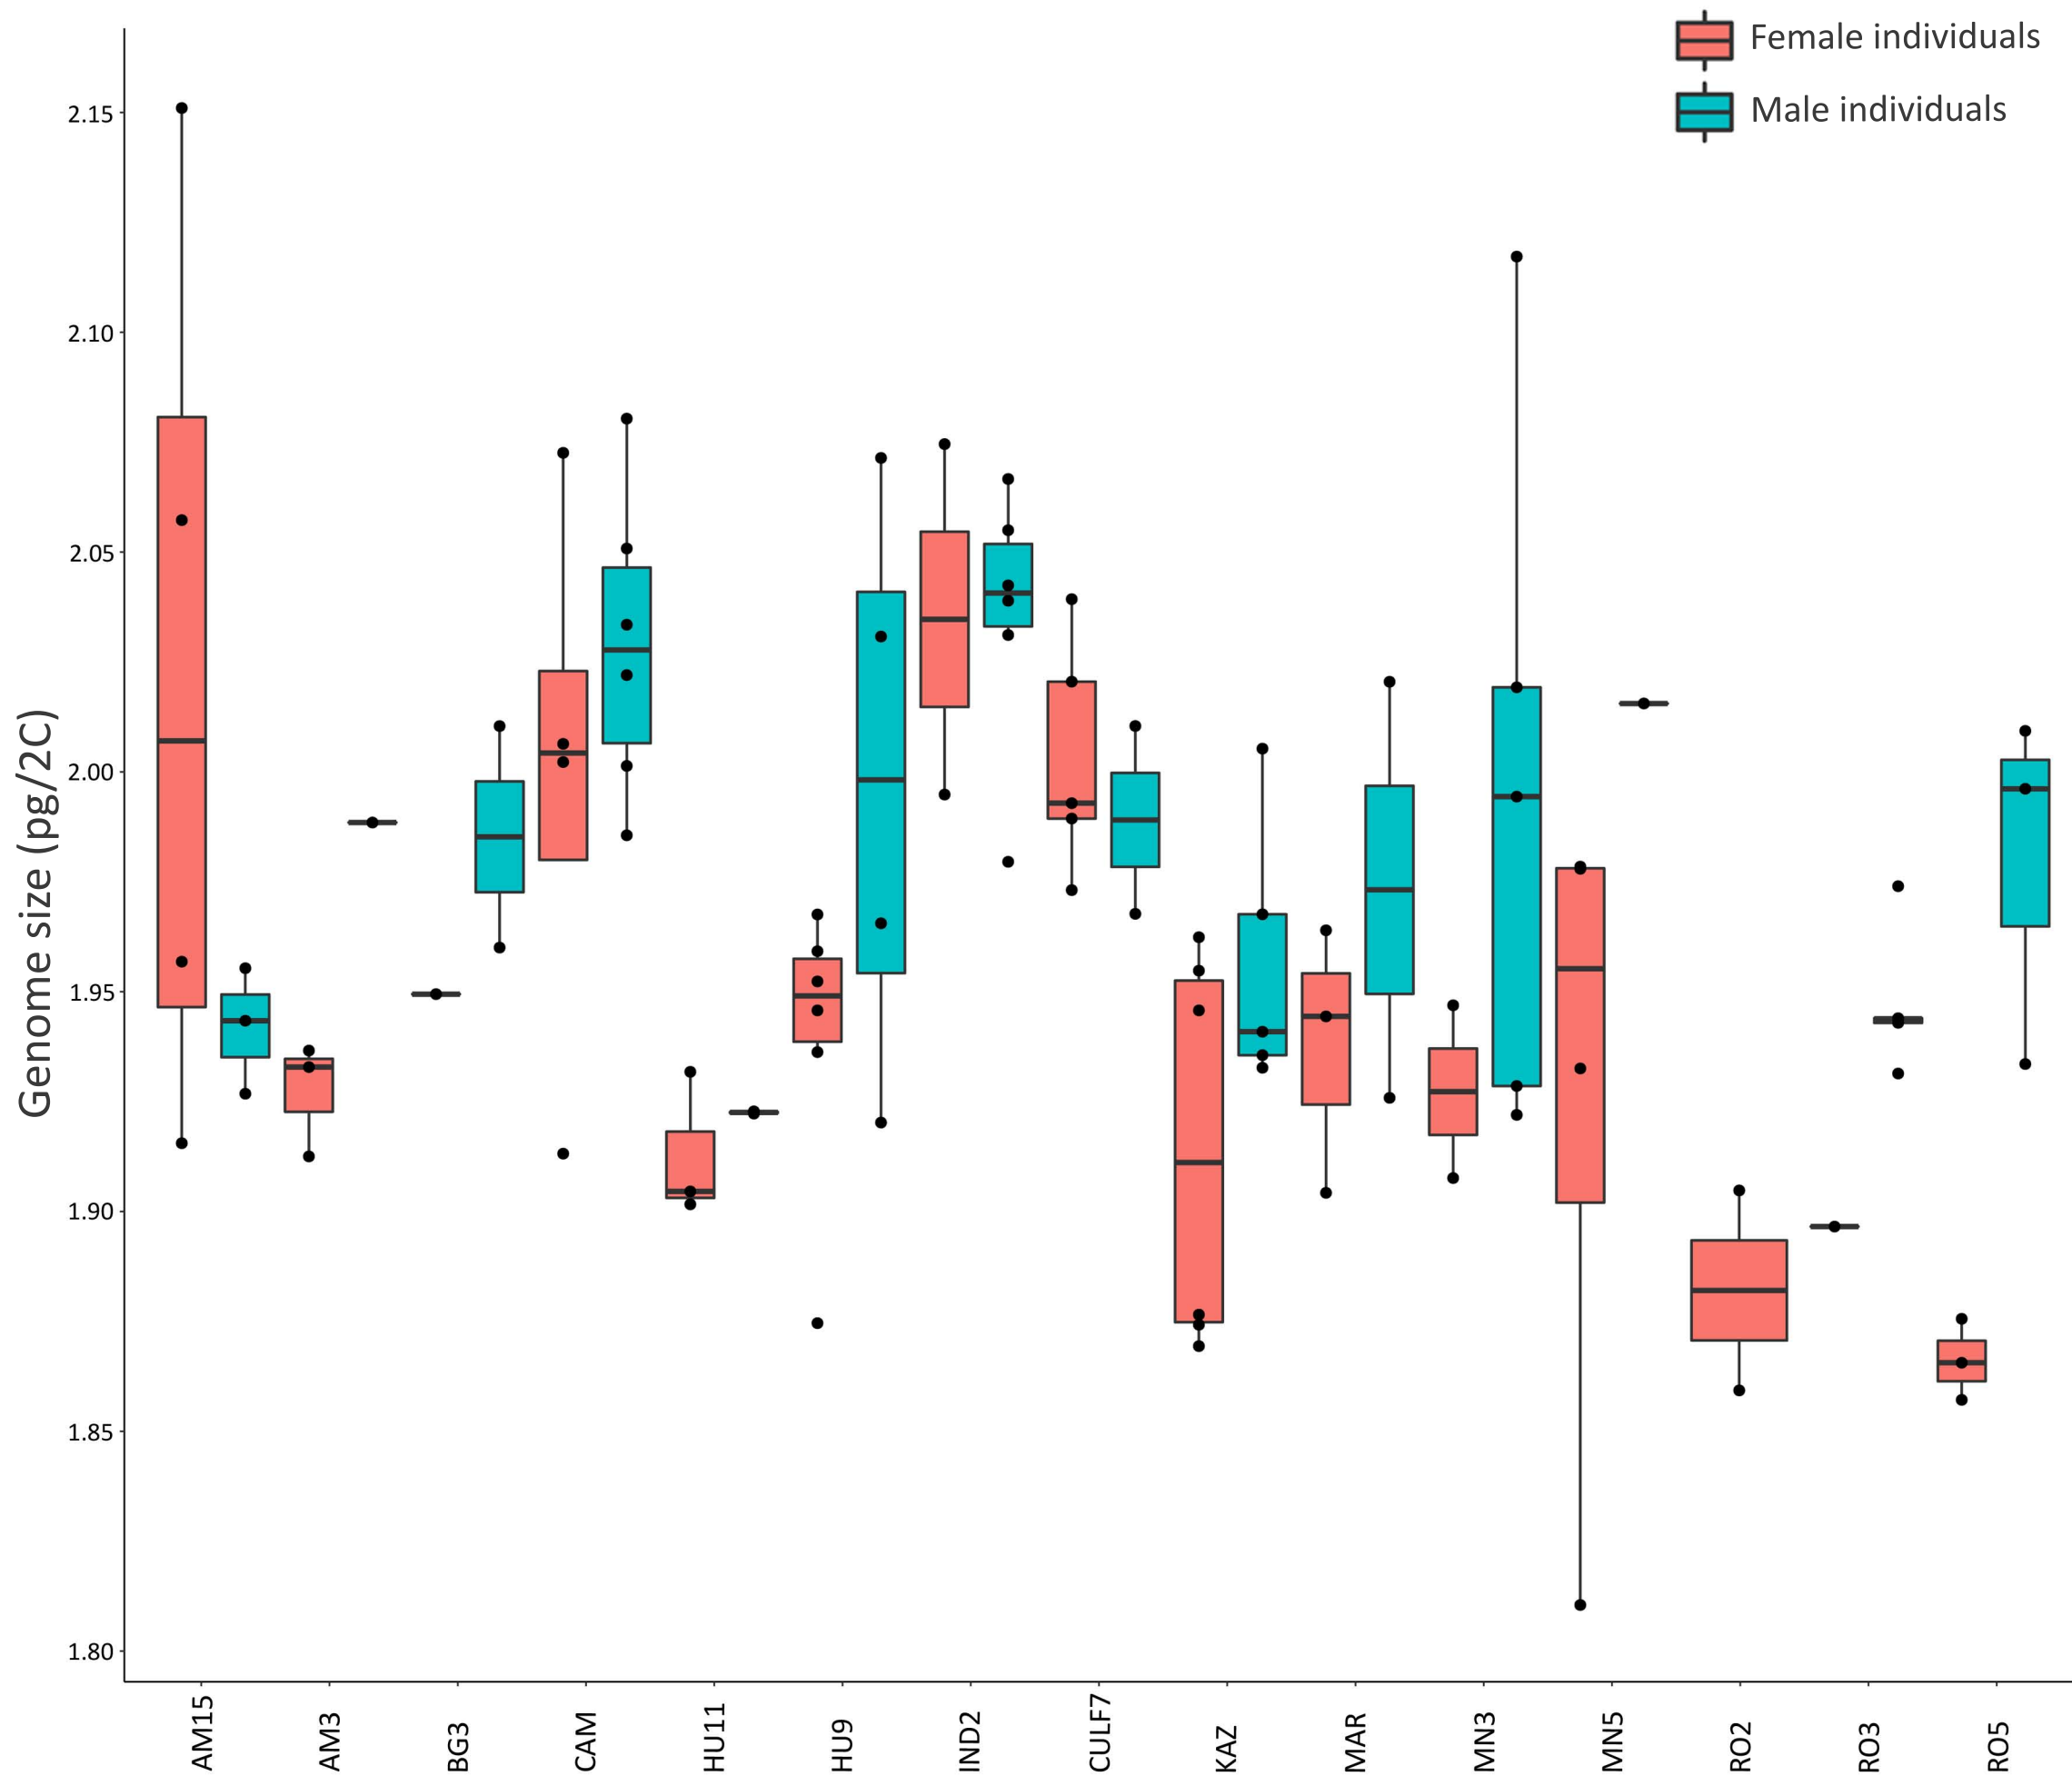

Supplement: s1 [file s1]
